# Supplementary material for: Increased protein synthesis by cells exposed to a 1,800-MHz radio-frequency mobile phone electromagnetic field, detected by proteome profiling
Source: Springer Nature journal article supplement (doi:10.1007/s00420-010-0513-7), 2010-02-09
Supplement: MOESM1 [file 8474928]

**26S protease regulatory subunit 6B (MIP224) (MB67-interacting protein) (TAT-binding protein 7) (TBP-7)****AccessionNr:** P43686**PI:** 5,09**MW:** 47366,5**Peptide:**

|                                      |              |
|--------------------------------------|--------------|
| 1. ENAPAIIFIDEIDAIATK                | Score: 14.48 |
| 2. ENAPAIIFIDEIDAIATKR               | Score: 12.85 |
| 3. EFLHAQEEVKR                       | Score: 12.37 |
| 4. IQSIPLVIGQFLEAVDQNTAIVGSTTGSNYYVR | Score: 13.58 |
| 5. ILSTIDRELLKPNASVALHK              | Score: 10.56 |

**AA-Coverage: 19.9 %**

MEEIGILVEKAQDEIPALSVSRPQTGLSFLGPEPEDLEDLYSRYKKLQQELEFLEVQEEYIKDEQKNLKK**EFLHAQEEVKRIQSIPLVIGQFLEAVDQNT**  
**AIVGSTTGSNYYVRILSTIDRELLKPNASVALHK**HSNALVDVLPPEADSSIMMLTSDQKPDVMYADIGGMDIQKQEVREAVELPLTHFELYKQIGIDPPR  
 GVLMYGPPGCGKTM LAKAVAHHTTAAFI R VVGSEFVQKYLGE GPRMVRDVFRLAK**ENAPAIIFIDEIDAIATKR**FDAQTGADREVQRILLELLNQMDGFD  
 QNVNVKVI MATNRADTLDPALLRPGRLDRKIEFFLPDRRQRLIFSTITSKMNLSEVDLEDYVARPDKISGADINSICQESGMLAVRENRYIVLAKDFE  
 KAYKTVIKKDEQEHEFYK

**78 kDa glucose-regulated protein precursor (GRP 78) (Immunoglobulin heavy chain-binding protein) (BiP) (Endoplasmic reticulum lumenal Ca(2+)-binding protein grp78)**

**AccessionNr:** P11021

**PI:** 5,07

**MW:** 72333,3

**Peptide:**

|                             |              |
|-----------------------------|--------------|
| 1. DNHLLGTFDLTGIPPAPR       | Score: 12.06 |
| 2. ELEEIVQPIISK             | Score: 17.17 |
| 3. KKELEEIVQPIISK           | Score: 15.17 |
| 4. KSDIDEIVLVGGSTR          | Score: 16.61 |
| 5. KVTHAVVTVPAYFNDAQR       | Score: 12.99 |
| 6. LYGSAGPPPTGEEDTAEKDEL    | Score: 17.92 |
| 7. NQLTSNPENTVFDAK          | Score: 16.84 |
| 8. SQIFSTASDNQPTVTIK        | Score: 18.17 |
| 9. TFAPEEISAMVLTK           | Score: 18.04 |
| 10. TKPYIQVDIGGGQTK         | Score: 15.93 |
| 11. IINEPTAAAIAAYGLDK       | Score: 21.97 |
| 12. IINEPTAAAIAAYGLDKR      | Score: 19.59 |
| 13. ITPSYVAFTPEGER          | Score: 17.29 |
| 14. NELESYAYSLK             | Score: 16.96 |
| 15. TWNDPSVQQDIK            | Score: 16.12 |
| 16. VEIANDQGNR              | Score: 14.04 |
| 17. NQLTSNPENTVFDAKR        | Score: 9.61  |
| 18. VTHAVVTVPAYFNDAQR       | Score: 13.57 |
| 19. DAGTIAGLNVMR            | Score: 16.77 |
| 20. AKFEELNMDLFR            | Score: 17.73 |
| 21. IEWLESHQDADIEDFK        | Score: 18.15 |
| 22. MKETAEAYLGK             | Score: 14.65 |
| 23. MKETAEAYLGKK            | Score: 14.18 |
| 24. FEELNMDLFR              | Score: 9.60  |
| 25. KTKPYIQVDIGGGQTK        | Score: 15.26 |
| 26. IEIESFYEGEDFSETLTR      | Score: 14.58 |
| 27. IINEPTAAAIAAYGLDK       | Score: 21.97 |
| 28. AVEEKIEWLESHQDADIEDFK   | Score: 15.39 |
| 29. IEWLESHQDADIEDFKAK      | Score: 12.96 |
| 30. AVEEKIEWLESHQDADIEDFKAK | Score: 14.55 |

**AA-Coverage: 44.3 %**

MKLSLVAAML LLLS AARAEEDK KEDVGT VVGIDLG TTYSCVGV FKNR V E I I A N D Q N R I T P S Y V A F T P E G E R L I G D A A K N Q L T S N P E N T V F D A K R L I G R T W N D P S V Q Q D I K F L P F K V V E K K T K P Y I Q V D I G G G Q T K T F A P E E I S A M V L T K M K E T A E A Y L G K K V T H A V V T V P A Y F N D A Q R Q A T K D A G T I A G L N V M R I I N E P T A A A I A Y G L D K R E G E K N I L V F D L G G G T F D V S L L T I D N G V F E V V A T N G D T H L G G E D F D Q R V M E H F I K L Y K K K T G K D V R K D N R A V Q K L R R E V E K A K R A L S S Q H Q A R I E I E S F Y E G E D F S E T L T R A K F E E L N M D L F R S T M K P V Q K V L E D S D L K K S D I D E I V L V G G S T R I P K I Q Q L V K E F F N G K E P S R G I N P D E A V A Y G A A V Q A G V L S G D Q D T G D L V L L D V C P L T L G I E T V G G V M T K L I P R N T V V P T K K S Q I F S T A S D N Q P T V T I K V Y E G E R P L T K D N H L L G T F D L T G I P P A P R G V P Q I E V T F E I D V N G I L R V T A E D K G T G N K N K I T I T N D Q N R L T P E E I E R M V N D A E K F A E E D K K L K E R I D T R N E L E S Y A Y S L K N Q I G D K E K L G G K L S S E D K E T M E K A V E E K I E W L E S H Q D A D I E D F K A K K K E L E E I V Q P I I S K L Y G S A G P P P T G E E D T A E K D E L

**Elongation factor 2 (EF-2)****AccessionNr:** P13639**PI:** 6,42**MW:** 95207,5**Peptide:**

|                                 |              |
|---------------------------------|--------------|
| 1. ARPPFDGLAEDIDKGEVSAR         | Score: 22.13 |
| 2. AYLPVNESFGFTADLR             | Score: 17.74 |
| 3. EGIPALDNFLDKL                | Score: 17.57 |
| 4. GPLMMYISK                    | Score: 10.75 |
| 5. STAISLFYELSENDLNFIK          | Score: 19.02 |
| 6. TGTITTFEHAHNMR               | Score: 10.74 |
| 7. ETVSEESNVLCLSK               | Score: 19.31 |
| 8. KIWCFGPDGTGPNILTDITK         | Score: 18.86 |
| 9. LMEPIYLVEIQCEQVVGGIYGVNLNR   | Score: 16.74 |
| 10. TFCQLILDPIFK                | Score: 18.00 |
| 11. VFSGLVSTGLK                 | Score: 12.02 |
| 12. YVEPIEDVPCGNIVGLVGVDQFLVK   | Score: 11.33 |
| 13. GVQYLNEIKDSVVAGFQWATK       | Score: 17.05 |
| 14. CLYASVLTAQPR                | Score: 14.66 |
| 15. GHVFEESQVAGTPMFVVK          | Score: 14.37 |
| 16. VFDAIMNFK                   | Score: 12.23 |
| 17. WLPAGDALLQMITIHLPSVTAQK     | Score: 19.06 |
| 18. YLAEKYEWVVAEAR              | Score: 22.19 |
| 19. NMSVIAHVDHGK                | Score: 9.41  |
| 20. DGAGFLINLIDSPGHVDFSSEVTAALR | Score: 22.26 |
| 21. IWCFGPDGTGPNILTDITK         | Score: 17.50 |
| 22. ALLELQLEPEELYQTFQR          | Score: 18.38 |
| 23. RCLYASVLTAQPR               | Score: 15.33 |
| 24. RWLPAGDALLQMITIHLPSVTAQK    | Score: 19.26 |
| 25. FAAKGEGQLGPAER              | Score: 15.28 |
| 26. GLKEGIPALDNFLDKL            | Score: 11.58 |
| 27. LIEKLDIK                    | Score: 10.17 |
| 28. TFCQLILDPIFKVFDAIMNFVK      | Score: 13.06 |

**AA-Coverage: 44.5 %**

MVNFVTVDQIRAIMDKKANIR**NMSVIAHVDHGK**STLTDSLVCAGIIASARAGETRFTDRKDEQERCITIK**STAISLFYELSENDLNFIK**QSKDGAGFLI  
**NLIDSPGHVDFSSEVTAALR**VTDGALVVDCVSGVCVQTETVLRQAI AERIKPVLMMNKMDR**ALLELQLEPEELYQTFQR**IVENVNVIISTYGEGESGPM  
GNIMIDPVLGTVGFGSGLHGWAFTLKQFAEMYVAK**FAAKGEGQLGPAER**AKKVEDMMKKLWGDYFDPANGKFSKSATSPGKKLPR**TFCQLILDPIFKV**  
**FDAIMNFVK**KEETAK**LIEKLDIK**L DSEDKKEGKPLLKAVMR**RWLPAGDALLQMITIHLPSVTAQK**YRCELLYEGPPDDEAAMGIKSCDPK**GPLMMYISK**  
MVPTSDKGRFYAFGR**VFSGLVSTGLK**V RIMGPNYTPGKKEDLYLKP I QRTILMMGR**YVEPIEDVPCGNIVGLVGVDQFLVK**TGTITTFEHAHNMRVMKFS  
VSPVVRVAVEAKNPADLPKLV EGLKRLAKSDPMVQCIIEESGEHI IAGAGELHLEICLKDLEEDHACIPIKSDPVVSYRE**TVSEESNVLCLSK**SPNKHN  
RLYMK**ARPPFDGLAEDIDKGEVSAR**QELKQRARY**LAEKYEWVVAEAR**KIWCFGPDGTGPNILTDITK**GVQYLNEIKDSVVAGFQWATK**EGALCEENMRGV  
RFDVHDVTLHADAIHRGGGQIIP TAR**RCLYASVLTAQPR**LMEPIYLVEIQCEQVVGGIYGVNLNRKR**GHVFEESQVAGTPMFVVK**KAYLPVNESFGFTADL  
**RSNTGGQAF**PQCVFDHWQIILPGDPFDNSSRPSQVVAETRKRK**GLKEGIPALDNFLDKL**

---

**Heat shock 70 kDa protein 1 (HSP70.1) (HSP70-1/HSP70-2)**

---

**AccessionNr:** P08107**PI:** 5,48**MW:** 70052,6**Peptide:**

|                     |              |
|---------------------|--------------|
| 1. TTPSYVAFTDTER    | Score: 14.20 |
| 2. VEIANDQGNR       | Score: 14.04 |
| 3. IINEPTAAAIAYGLDR | Score: 19.88 |
| 4. IINEPTAAAIAYGLDR | Score: 19.88 |
| 5. AFYPEEISSMVLTK   | Score: 17.64 |

---

**AA-Coverage: 8.4 %**

MAKAAAIGIDLGTYSVGVFQHGK**VEI IANDQGNRTTPSYVAFTDTER**LIGDAAKNQVALNPQNTVFDAKRLIGRKFQDPVVQSDMKHWPFFQVINDGDK  
PKVQVSYKGD**TKAFYPEEISSMVLTK**MKEIAEAYLGYPVTNAVITVPAYFNDSQRQATKDAGVIAGLNLVLR**IINEPTAAAIAYGLDR**TGKGERNVLIFDL  
GGGTFDVSILTIIDDGIFEVKATAGDTHLGGEDFDNRLVNHFVEEFKRKHKKDISQNKRAVRRRLRTACERAKRTLSSSTQASLEIDSLFEGIDFYTSITRA  
RFEELCSDLFRSTLEPVEKALRDAKLDKAQIHDLVLVGGSTRIPKVQKLLQDFNGRDLNKSINPDEAVAYGAAVQAAILMGDKSENVQDLLLLDVAPLS  
LGLETAGGVMTALIKRNSTIPTKQTQIFTTYSDNQPGVLIQVYEGERAMTKDNLLGRFELSGIPPAPRGVPQIEVTFDIDANGILNVTATDKSTGKANK  
ITITNDKGRLSKEEIERMVQEAKEYKAEDEVQRERVSAKNALESYAFNMKSAVEDEGLKGI SEADKKKVLDKCQEVISWLDANTLAEKDEFEHKRKELE  
QVCNPIISGLYQGAGGPGGGFQAQGPKGGSGSGPTIEVD

---

**Heat shock 70 kDa protein 4 (Heat shock 70-related protein APG-2) (HSP70RY)**


---

**AccessionNr:** P34932

**PI:** 5,18

**MW:** 94300,5

---

**Peptide:**

|                                   |              |
|-----------------------------------|--------------|
| 1. GCALQCAILSPAFAK                | Score: 14.89 |
| 2. ELSTTLNADEAVTR                 | Score: 14.11 |
| 3. VLATAFDTTLGGR                  | Score: 13.78 |
| 4. AGGIETIANEYSDR                 | Score: 16.65 |
| 5. EFSITDVVPYPISLR                | Score: 11.57 |
| 6. FLEMCNDLLAR                    | Score: 18.26 |
| 7. NFTTEQVTAMLLSK                 | Score: 17.35 |
| 8. LMNETTAVALAYGIYK               | Score: 14.40 |
| 9. SNLAYDIVQLPTGLTIK              | Score: 11.35 |
| 10. SVM DATQIAGLNCLR              | Score: 13.98 |
| 11. LMNETTAVALAYGIYKQDLPAL EEEKPR | Score: 17.61 |
| 12. LKKEDIYAVEIVGGATR             | Score: 13.65 |

---

**AA-Coverage: 20.5 %**

MSVVGIDLGFQSCYVAVARAGGIETIANEYSDRCTPACISFGPKNRSIGAAKSQVISNAKNTVQGFKRFGRAFSDPFVEAEKSNLAYDIVQLPTGLTIK  
IKVTYMEEERNFTTEQVTAMLLSKLKETAESVLKKPVVDCVVSVPFCFYTDAERRSVM DATQIAGLNCLR LMNETTAVALAYGIYKQDLPAL EEEKPRNVVF  
VDMGHSAYQVSVCAFNRGKLVLATAFDTTLGGRKFDEVLVNHFC EEFGKKYKLDIKSKIRALLRLSQECEK LK LMSANASDLPLSIECFMNDVDVSGT  
MNRGKFLEMCNDLLARVEPPLRSVLEQT LKKEDIYAVEIVGGATRIPAVKEKISKFFGKELSTTLNADEAVTRGCALQCAILSPAFAKVFESITDVVPY  
PISLRWNSPAEEGSSDCEVF SKNHAA PFSKVLTFYRKEPFTLEAYYSSPQDL PYPDPATAQFSVQKVT PQSDGSSSKVKVVRVNVHGIFSVSSASLVEV  
HKSEENEPMETDQNAKEEEKMQVDQEEPHVEEQQQQTPAENKAESEEMETSQAGSKDKKMDQPPQAKKAKVKTSTVDLPIENQLLWQIDREMLNLYIEN  
EGKMIMQDKLEKERNDAKNAVREYVYEMRDKLSGEYEK FVSEDGRNSFTLKLEDTENWLYEDGEDQPKQVYVDKLAELKNLGQPIKIRFQSEERPKLFE  
ELGKQIQQYMKI I SSFKNKEDQYDHLDAADMTKVEKSTNEAMEWMNNKLNQNKQSLTMDPVVKSKEIEAKIKELTSTCSPIISKPKPKVEPPKKEQKNA  
EQNGPVDGQDNP GPQAAEQGTD TAVPSDSDK KLP EMDID

## Heat shock protein HSP 90-beta (HSP 84) (HSP 90)

AccessionNr: P08238

PI: 4,97

MW: 83133,4

## Peptide:

|                           |              |
|---------------------------|--------------|
| 1. HFSVEGQLEFR            | Score: 10.72 |
| 2. GVVDEDLPLNISR          | Score: 18.42 |
| 3. EQVANSAFVER            | Score: 10.02 |
| 4. ELISNASDALDKIR         | Score: 16.56 |
| 5. YESLTDPSKLDGSK         | Score: 12.91 |
| 6. IDIIPNPQER             | Score: 12.95 |
| 7. YHTSQSGDEMTSLSEYVSR    | Score: 15.60 |
| 8. SLTNDWEDHLAVK          | Score: 17.71 |
| 9. VILHLKEDQTEYLEER       | Score: 18.94 |
| 10. ELISNASDALDKIR        | Score: 16.56 |
| 11. HLEINPDHPIVETLR       | Score: 21.96 |
| 12. HSQFIGYPITLYLEK       | Score: 21.91 |
| 13. NPDDITQEEYGEFYK       | Score: 21.30 |
| 14. ELISNASDALDK          | Score: 9.96  |
| 15. HSQFIGYPITLYLEKER     | Score: 19.62 |
| 16. LVSSPCCIVTSTYGWTANMER | Score: 12.60 |
| 17. RAPFDLFENK            | Score: 12.30 |
| 18. ELKIDIIPNPQER         | Score: 13.16 |
| 19. TLTLVDTGIGMTK         | Score: 20.40 |
| 20. CLELFSELAEDKENYK      | Score: 13.74 |
| 21. CLELFSELAEDKENYKK     | Score: 16.33 |
| 22. HNDDEQYAWESSAGGSFTVR  | Score: 18.86 |
| 23. VFIMDSCELIPEYLNfir    | Score: 13.93 |
| 24. IRYESLTDPSKLDGSK      | Score: 9.92  |
| 25. KHLEINPDHPIVETLR      | Score: 16.64 |
| 26. KHSQFIGYPITLYLEK      | Score: 15.70 |
| 27. VILHLKEDQTEYLEERR     | Score: 17.07 |
| 28. GFEVVYMTPEIDCYVQQLK   | Score: 22.42 |
| 29. RAPFDLFENKK           | Score: 12.37 |
| 30. RVFIMDSCELIPEYLNfir   | Score: 18.20 |
| 31. YIDQEELNKTPIWTR       | Score: 14.86 |
| 32. ADLNNLGTIAK           | Score: 16.00 |
| 33. VILHLKEDQTEYLEER      | Score: 21.14 |
| 34. KHSQFIGYPITLYLEKER    | Score: 11.02 |

## AA-Coverage: 44.9 %

MPEEVHHGEEVETFAFAQAEIAQLMSLIINTFYNSKEIFLRELISNASDALDKIRYESLTDPSKLDGSKELKIDIIIPNPQERTLTLVDTGIGMTKADLIN  
 NLGTIAKSGTKAFMEALQAGADISMIQQFGVGFYSAYLVAEKVVVITKHNDDEQYAWESSAGGSFTVRADHGEPiGRGTKVILHLKEDQTEYLEERRVKE  
 VVKKHSQFIGYPITLYLEKEREREKESDDEAEEEEKGEKEEEDKDEEKPKIEDVGSDEEDSDGDKKKKTKIKEKYIDQEELNKTPIWTRNPDDITQEE  
 YGEFYKSLTNDWEDHLAVKHFSVEGQLEFRALLFIPRRAPFDLFENKKKNNIKLYVRVVFIMDSCELIPEYLNfirGVVDEDLPLNISREMLQQSKI  
 LKVIKRNIVKKCLELFSELAEDKENYKKFYEAFSKNLKLGIHEDSTNRRRSELRLYHTSQSGDEMTSLSEYVSRMKETQKSIYYITGESKEQVANSAFV  
 ERVRRKRGFEVVYMTPEIDCYVQQLKEFDGKSLVSVTKEGLELPEDEEEKKMEESKAKFENLCKLMKEILDKKVEKVTISNRLVSSPCCIVTSTYGWTA  
 NMERIMKAQALRDNSTMGYMMAKKHLEINPDHPIVETLRQKAEADKNDKAVKDLVLLFETALLSSGFSLEDPQTHSNRIYRMIKLGIGIDEDEVAAEEP  
 NAAVPDEIPPLEGDEDASRMEEVD

---

**Heterogeneous nuclear ribonucleoprotein F (hnRNP F) (Nucleolin-like protein mcs94-1)**

---

**AccessionNr:** P52597**PI:** 5,38**MW:** 45540,9**Peptide:**

|                        |              |
|------------------------|--------------|
| 1. ATENDIYNFFSPLNPVR   | Score: 18.88 |
| 2. ITGEAFVQFASQELAEK   | Score: 17.02 |
| 3. QSGEAFVELGSEDDVK    | Score: 13.50 |
| 4. YGDSEFTVQSTTGHCVHMR | Score: 12.12 |
| 5. DLSYCLSGMYDHR       | Score: 15.37 |

---

**AA-Coverage: 19.8 %**

MMLGPEGGEGFVVKLRGLPWSCSVEDVQNFLSDCTIHDGAAGVHFIYTRREGRQSGEAFVELGSEDDVKMALKKDRESMGHRYIEVFKSHRTEMDWVLKHS  
GPNSADSANDGFVRLRGLPFGCTKEEIVQFFSGLIIVPNGITLTPVDEGKIITGEAFVQFASQELAEKALGKHKERIGHRYIEVFKSSQEEVRSYSDPPLK  
FMSVQRPGPYDRPGTARRYIGIVKQAGLERMRPGAYSTGYGGYEEYSGLSDGYGFTTDLFGRDLSYCLSGMYDHRYGDEFTVQSTTGHCVHMRGLPYKA  
TENDIYNFFSPLNPVRVHIEIGPDGRVTGEADVEFATHEEAVAAMSKDRANMQHRYIELFLNSTTGASNGAYSSQVMQGMGVSAQAQATYSGLESQSVSGC  
YGAGYSGQNSMGGYD

---

**Neutral alpha-glucosidase AB precursor (EC 3.2.1.84) (Glucosidase II alpha subunit)**


---

**AccessionNr:** Q14697**PI:** 5,73**MW:** 106874,5**Peptide:**

|                                           |              |
|-------------------------------------------|--------------|
| 1. LSFQHDPETSVLVLR                        | Score: 11.91 |
| 2. SLLLSVNAR                              | Score: 15.65 |
| 3. VVIIGAGKPAAVVLQTK                      | Score: 20.09 |
| 4. YRVPDVLVADPPIAR                        | Score: 13.32 |
| 5. VLLVLELQGLQK                           | Score: 15.30 |
| 6. ALLDSLQLGPDSLTVHLIHEVTK                | Score: 18.72 |
| 7. FGAVWTGDNTAEWDHLK                      | Score: 16.96 |
| 8. KPGINVASDWSIHLR                        | Score: 17.87 |
| 9. VSQGSKDPAEGDGAQPEETPR                  | Score: 17.21 |
| 10. WYQMGAYQPFFR                          | Score: 9.58  |
| 11. YFTWDPSTRFPQPR                        | Score: 11.19 |
| 12. YSLLPFWYTLLYQAHR                      | Score: 12.86 |
| 13. QYASLTGTQALPPLFSLGYHQSR               | Score: 16.56 |
| 14. DVHNIYGLYVHMATADGLR                   | Score: 17.21 |
| 15. THSDSKPYGPMVSVGLDFSLPGMEHVYGIPEHADNLR | Score: 20.09 |

---

**AA-Coverage: 27.9 %**

MAAVALAARRRRSWASLVLAFLGVCLGITLAVDRSNFKTCEESSFCKRQRSIRPGLSPYR**ALLDSLQLGPDSLTVHLIHEVTKVLLVLELQGLQK**NMTR  
FRIDELEPRRPR**YRVPDVLVADPPIAR**LSVSGRDENSVELTMAEGPYKIILTARPFRLDLED**SLLLSVNARGLLEFEHQRAPRVSQGSKDPAEGDGAQ**  
**PEETPR**DGDKPEETQGKAEKDEPGAWEEETFK**THSDSKPYGPMVSVGLDFSLPGMEHVYGIPEHADNLR**LKVTEGGEYRLYNLDVDFQYELYNPMALYGSVP  
VLLAHNPHRDLGIFWLNAEETWVDISSNTAGKTLFGKMMDYLQGSGETPQTDVRWMSETGIIDVFLLLGPSISDVFR**QYASLTGTQALPPLFSLGYHQSR**  
WNYRDEADVLEVDQGFDDHNLPCDVIWLDIEHADGKR**YFTWDPSTRFPQPR**TMLERLASKRRKLVAIVDPHIKVDSGYRVHEELRNGLYVKTRDGSYEG  
WCWPGSAGYPDFTNPTMRAWANMFSYDNYEGSAPNLFVWDMNEPSVFNPEVTMLKDAQHYGGWEHR**DVHNIYGLYVHMATADGLR**QRSGMERPFVL  
ARAFFAGSQR**FGAVWTGDNTAEWDHLK**ISIPMCLSLGLVGLSFCGADVGGFFKNPEPELLVR**WYQMGAYQPFFRAHAHLDTGRREPWLLPSQHNDIIRDA**  
LGQR**YSLLPFWYTLLYQAHR**EGIPVMRPLWVQYPQDVTTFNIDDQYLLGDALLVHPVSDSGAHGVQVYLPQGEVWYDIQSYQKHHGPQTLYLPVTLSSI  
PVFQRRGTTIVPRWVRVRSSECMKDDPITLVALSPQGTAQGELFLDDGHTFNQTRQEFLLRRFSFSGNTLVSSADPEGHFETPIWIER**VVIIGAGKPA**  
**AAVVLQTKGSPESRLSFQHDPETSVLVLRKPGINVASDWSIHLR**



---

**T-complex protein 1 subunit alpha (TCP-1-alpha) (CCT-alpha)**


---

**AccessionNr:** P17987**PI:** 5,80**MW:** 60343,9**Peptide:**

|                                  |              |
|----------------------------------|--------------|
| 1. FATEAAITILR                   | Score: 10.74 |
| 2. EQLAIAEFAR                    | Score: 14.79 |
| 3. ICDELILIK                     | Score: 14.27 |
| 4. TSASILR                       | Score: 9.92  |
| 5. YINENLIVNTDELGR               | Score: 15.48 |
| 6. YPVNSVNILK                    | Score: 9.11  |
| 7. ILATGANVILTTGGIDDMCLK         | Score: 15.37 |
| 8. YFVEAGAmAVR                   | Score: 16.95 |
| 9. SQNVmAAASIANIVK               | Score: 17.69 |
| 10. LGVQVVITDPEKLDQIR            | Score: 18.38 |
| 11. SLLVIPNTLAVNAAQDSTDLVAK      | Score: 17.08 |
| 12. MLVDDIGDVTITNDGATILK         | Score: 15.00 |
| 13. GANDFMCDEMER                 | Score: 16.57 |
| 14. VLCELADLQDKEVGDGTTSVVIAAELLK | Score: 16.57 |
| 15. SVVPGGAVEAALSIIYLENYATSMGSR  | Score: 14.84 |

---

**AA-Coverage: 43.0 %**

MEGPLSVFGDRSTGETIRSQNVMAAASIANIVKSSSLGPVGLDKMLVDDIGDVTITNDGATILKLLEVEHPAAKVLCELADLQDKEVGDGTTSVVIAAELLKNADELVKQKIHPTSVISGYRLACKEAVRYINENLIVNTDELGRDCLINAAKTSMSSKIIGINGDFFANMVVDAVLAIKYTDIRGQPRYPVNSVNILKAHGRSQMESMLISGYALNCVVGSGQMPKRIVNAKIACLDFSLQKTKMKLGVQVVITDPEKLDQIRQRESDTKERIQKILATGANVILTTGGIDDMCLKYFVEAGAMAVRRVLKRDLEKRIAKASGATILSTLANLEGEETFEAAMLGQAEVQERICDELILIKNTKARTSASIIIRGANDFMCDEMERSLHDALCVVKRVLESKSVVPGGAVEAALSIIYLENYATSMGSRQLAIAEFARSLVIPNTLAVNAAQDSTDLVAKLRAFHNEAQNPERKNLKWIGLDLSNGKPRDNKQAGVFEPTIVKVKSLKFATEAAITILRIDDLIKLHPESKDDKHGSYEDAVHSGALND

**T-complex protein 1 subunit beta (TCP-1-beta) (CCT-beta)****AccessionNr:** P78371**PI:** 6,02**MW:** 57357,3**Peptide:**

|                                   |              |
|-----------------------------------|--------------|
| 1. LAVEAVLR                       | Score: 12.53 |
| 2. EALLSSAVDHGSDEVK               | Score: 13.00 |
| 3. GATQQILDEAER                   | Score: 10.19 |
| 4. LKSGNLEAIHIK                   | Score: 12.39 |
| 5. LTSFIGAIAIGDLVK                | Score: 13.95 |
| 6. QDLMNIAGTTLSSK                 | Score: 15.74 |
| 7. QVLLSAAEAAEVILR                | Score: 17.27 |
| 8. SLHDALCVLAQTVK                 | Score: 18.31 |
| 9. VQDDEVDGTTSVTVLAAELLR          | Score: 9.31  |
| 10. ILIANTGmDTDKIK                | Score: 14.01 |
| 11. DASLmVTNDGATILK               | Score: 21.00 |
| 12. EALLSSAVDHGSDEVKFR            | Score: 15.02 |
| 13. LGGSLADSYLDEGFLLDKK           | Score: 14.42 |
| 14. LIEEVMIGEDK                   | Score: 14.01 |
| 15. LALVTGGEIASTFDHPELVK          | Score: 17.50 |
| 16. KLGSLADSYLDEGFLLDKK           | Score: 18.69 |
| 17. AAHSEGNTTAGLDMR               | Score: 13.04 |
| 18. MLPTIIADNAGYDSADLVAQLR        | Score: 16.10 |
| 19. EGTIGDMAILGITESFQVKR          | Score: 12.68 |
| 20. TVYGGGCSEMLMAHAVTQLANR        | Score: 11.36 |
| 21. GATQQILDEAERSLHDALCVLAQTVK    | Score: 9.34  |
| 22. GATQQILDEAERSLHDALCVLAQTVKDSR | Score: 9.12  |
| 23. LIEEVMIGEDKLIHFSGVALGEACTIVLR | Score: 18.82 |

**AA-Coverage: 58.3 %**

MASLSLAPVNIKFAGADEERAETARLTSFIGAIAIGDLVKSTLGPKGMDKILLSSGRDASLMVTNDGATILKNIGVDNPAAKVLVDMRSRVQDDEVDGTT  
SVTVLAAELLREAESLIAKKIHPQTI IAGWREATKAAREALLSSAVDHGSDEVKFRQDLMNIAGTTLSSKLLTHHKDHFTKLAVEAVLRLKSGNLEAIH  
I IKKLGSLADSYLDEGFLLDKKIGVNQPKRIENAKILIAN TGMDTDKIKIFGSRVRVDSTAKVAEIEHAEKEKMKKEKVERILKHGINCFINRQLIYNYP  
EQLFGAAGVMAIEHADFAGVERLALVTGGEIASTFDHPELVKLGSKLIEEVMIGEDKLIHFSGVALGEACTIVLRGATQQILDEAERSLHDALCVLAQT  
VKDSRTVYGGGCSEMLMAHAVTQLANRTPGKEAVAMESYAKALRMLPTIIADNAGYDSADLVAQLRAAHSEGNTTAGLDMREGTIGDMAILGITESFQVK  
RQVLLSAAEAAEVILRVDNI IKAAPRKRVPDHHPC

---

**T-complex protein 1 subunit epsilon (TCP-1-epsilon) (CCT-epsilon)**


---

**AccessionNr:** P48643**PI:** 5,45**MW:** 59671,4**Peptide:**

|                                  |              |
|----------------------------------|--------------|
| 1. LGFAGLVQEISFGTTK              | Score: 20.25 |
| 2. DVDFELIKVEGK                  | Score: 19.24 |
| 3. IAILTCPFEPKPK                 | Score: 15.21 |
| 4. HKLDVTSVEDYK                  | Score: 10.94 |
| 5. QQISLATQMVR                   | Score: 13.02 |
| 6. WVGPEIELIAIATGGR              | Score: 17.62 |
| 7. EKFEEMIQQIK                   | Score: 11.52 |
| 8. EMNPALGIDCLHK                 | Score: 17.32 |
| 9. GVIVDKDFSHQPMPK               | Score: 15.09 |
| 10. SLHDALCVIR                   | Score: 12.27 |
| 11. YEKEKFEEMIQQIK               | Score: 12.38 |
| 12. LGFAGLVQEISFGTTKDK           | Score: 12.15 |
| 13. TKHKLDVTSVEDYK               | Score: 9.67  |
| 14. SQDDEIGDGTGVVVLGALLEEAEQLLDR | Score: 15.84 |

---

**AA-Coverage: 31.1 %**

MASMGTLAFDEYGRPFLLI IKDQDRKSRMLGLEALKSHIMAAKAVANTMRTSLGPNGLDKMMVDKGDVTVTNDGATILSMMDVDHQIAKLMVELSKSQDDEIGDGTGVVVLGALLEEAEQLLDRGIHPRIADGYEQAAARVAIEHLDKISDSVLVDIKDTEPLIQTAKTTLGSKVVNSCHRQMAEIAVNAVLTVADMERRDVDFELIKVEGKVGGRLEDTKLIKGVIVDKDFSHQPMPKVEDAKIAILTCPFEPKPKTKHKLDVTSVEDYKALQKYEKEKFEEMIQQIKETGANLAICQWGFDDANHLLLQNNLPAVRWVGPEIELIAIATGGRIVPRFSELTAEKLGFAGLVQEISFGTTKDKMLVIEQCCKNSRAVTIFIRGGNKMIIEEAKRSLHDALCVIRNLIRDNRVYGGAAEISCALAVSQEADKCPLEQYAMRAFADALEVIMALSENSGMNPIQTMTEVRARQVKEMNPALGIDCLHKGTNDMKQQHVIEFLIGKKQQISLATQMVRMILKIDDIRKPGSESE

---

**T-complex protein 1 subunit gamma (TCP-1-gamma) (CCT-gamma) (hTRiC5)**


---

**AccessionNr:** P49368**PI:** 6,10**MW:** 60534,3**Peptide:**

|                                |              |
|--------------------------------|--------------|
| 1. GISDLAQHYLMR                | Score: 17.29 |
| 2. TAVETAVLLLR                 | Score: 17.53 |
| 3. IVLLDSSLEYK                 | Score: 14.55 |
| 4. IVSRPEELREDDVGTGAGLLEIK     | Score: 14.11 |
| 5. NVLLDPQLVPGGGASEMAVAHALTEK  | Score: 16.26 |
| 6. ALDDMISTLK                  | Score: 9.35  |
| 7. AMTGVEQWPYR                 | Score: 15.06 |
| 8. ELGIWEPLAVK                 | Score: 16.47 |
| 9. IPGGIIEDSCVLR               | Score: 11.34 |
| 10. MLLDPMGGIVMTNDGNAILR       | Score: 20.62 |
| 11. WSSLACNIALDAVK             | Score: 13.84 |
| 12. KISIPVDISDSMMLNIINSITTK    | Score: 11.19 |
| 13. ILQMEEYIQLCEDIIQLKPDVVITEK | Score: 20.76 |

---

**AA-Coverage: 39.4 %**

MMGHRPVLVLSQNTKRESGRKVQSGNINAAKTIADIIRTCLGPKSMMK**MLLDPMGGIVMTNDGNAILREIQVQHPAAKSMIEISRTQDEEVGDGTTSVII**  
LAGEMLSVAEHFLEQQMHPTVVISAYRK**ALDDMISTLKKISIPVDISDSMMLNIINSITTKAISRWSSLACNIALDAVKMVQFEENGRKEIDIKKYAR**  
VEK**IPGGIIEDSCVLR**GVMIKNDVTHPRMRRYIKNPRI**IVLLDSSLEYK**KGESQTDIEITREEDFTR**ILQMEEYIQLCEDIIQLKPDVVITEKGISDLA**  
**QHLYMRANITAIRRVKTDNNRIARACGARIVSRPEELREDDVGTGAGLLEIKKIGDEYFTFITDCKDPKACTILLRGASKEILSEVERNLDAMQVCRN**  
**VLLDPQLVPGGGASEMAVAHALTEKSKAMTGVEQWPYRAVAQALEVIPRTLIQNCGASTIRLLTSLRAKHTQENCETWGVNGETGTLVDMKELGIWEPLA**  
**VKLQTYKTAVETAVLLLR**IDDIVSGHKKKGDDQSRQGGAPDAGQE

---

**T-complex protein 1 subunit theta (TCP-1-theta) (CCT-theta)**


---

**AccessionNr:** P50990**PI:** 5,42**MW:** 59489,7**Peptide:**

|                           |              |
|---------------------------|--------------|
| 1. FAEAFEAI PR            | Score: 14.14 |
| 2. LFVTNDAATIL R          | Score: 18.42 |
| 3. AIADTGANVVVTGGK        | Score: 21.31 |
| 4. LATNAAVTVLR            | Score: 14.43 |
| 5. LIAQACVSIFPDSGHFNVDNIR | Score: 18.51 |
| 6. ILGSGISSSSVLHGMVFK     | Score: 18.15 |
| 7. NVGLDIEAEVPAVK         | Score: 19.45 |
| 8. LVPGGGATEIELAK         | Score: 14.22 |
| 9. APGFAQMLK              | Score: 9.76  |
| 10. DMLEAGILDTYLGK        | Score: 21.08 |
| 11. IAVYSCPFDMITETK       | Score: 17.29 |
| 12. QITSYGETCPGLEQYAIKK   | Score: 13.44 |
| 13. YNIMLVR               | Score: 11.10 |
| 14. DIDEVSSLLR            | Score: 15.95 |
| 15. GSTDNLMDDIER          | Score: 14.60 |
| 16. HFSGLEEA VYR          | Score: 13.82 |
| 17. VADMALHYANKYNIMLVR    | Score: 16.37 |
| 18. KFAEAFEAI PR          | Score: 12.13 |
| 19. KAHEILPNLVCCSAK       | Score: 15.48 |
| 20. AHEILPNLVCCSAK        | Score: 13.35 |
| 21. ILGSGISSSSVLHGMVFKK   | Score: 12.26 |

---

**AA-Coverage: 44.0 %**

MALHVPK**APGFAQMLK**EGAK**HFSGLEEA VYR**NIQACKELAQTTTRTAYGPNGMNKMVINHLEK**LFVTNDAATIL**RELEVQHPAAKMIVMASHMQEQEVGDG  
 TNFVLV**FAGALLELA**EELLRIGLSVSEVIEGYE**IACRKAHEILPNLVCCSAK**NLR**DIDEVSSLLR**TSIMSKQYGNVFLAK**LIAQACVSIFPDSGHFNVD**  
**NIRVCKILGSGISSSSVLHGMVFKK**ETEGDVT**SVKDAKIAVYSCPFDMITETK**GTVLIKTAEELMNF**SKGEENLMDAQVKA**IADTGANVVVTGGK**VADM**  
**ALHYANKYNIMLVR**LNSKWDLRRLCKTVGATALPRLTPPVLEEMGHCD**SVYLSEVGD**TQVVVFKHEKEDGAI**STIVLRGSTDNLMDDIER**AVDDGVNTFK  
 VLTRDKR**LVPGGGATEIELAKQITSYGETCPGLEQYAIKKFAEAFEAI**PRALAENSGVKANEV**ISKLYAVHQEGNKNVGLDIEAEVPAVKDMLEAGILDT**  
**YLGKYWAIK**LATNAAVTVLRVDQ**IIMAKPAGGPKPPSGK**KDWD**DDQND**

---

**Ubiquitin carboxyl-terminal hydrolase 14 (EC 3.1.2.15) (Ubiquitin thiolesterase 14) (Ubiquitin-specific-processing protease 14) (Deubiquitinating enzyme 14)**

---

**AccessionNr:** P54578**PI:** 5,20**MW:** 55938,2**Peptide:**

|                              |              |
|------------------------------|--------------|
| 1. AQLFALTGVQPAR             | Score: 17.66 |
| 2. LPAYLTIQMVR               | Score: 12.11 |
| 3. RVEIMEESEQ                | Score: 13.18 |
| 4. LEAIEDDSVKETDSSSASAATPSKK | Score: 15.92 |

---

**AA-Coverage: 12.1 %**

MPLYSVTVKWKKEKFEFEGVELNTDEPPMVFK**AQLFALTGVQPAR**QKVMVKGKGLKDDDWGNIKIKNGMTLLMMGSADALPEEPSAKTVFVEDMTEEQLASA  
MELPCGLTNLGNTCYMNATVQCIRSVPELKDALKRYAGALRASGEMASQYITAALRDLFDSMDKTSSSIPIILLQFLHMAFPQFAEKGEQGQYLQODA  
NECWIQMMRVLQQK**LEAIEDDSVKETDSSSASAATPSKK**KSLIDQFFGVFETTMKCTESEEEVTKGKENQLQLSCFINQEVKYLFTGLKLRRLQEEITK  
QSPTLQRNALYIKSSKISR**LPAYLTIQMVR**FFYKEKESVNAKVLKDVKFPLMLDMYELCTPELQEKMVSFRSKFKDLEDKKVNQQPNTSDKKSSPQKEVK  
YEPFSFADDIGSNCGYYDLQAVLTHQGRSSSSGHYVSWVKRKQDEWIKFDDDKVSIVTPEDILRLSGGGDWHIAYVLLYGPR**RVEIMEESEQ**
